# Supplementary material for: The CdTiO3/BaTiO3 superlattice interface from first principles
Source: Royal Society of Chemistry journal article supplement (doi:10.1039/d1nr00374g), 2021-01-01
Supplement: d1nr00374g10.pdf [file d1nr00374g10.pdf]

## Supplementary Information

### The CdTiO<sub>3</sub>/BaTiO<sub>3</sub> Superlattice Interface from First Principles

Le Fang<sup>1,2</sup>, Chen Chen<sup>1,2</sup>, A.Sundaresan<sup>3</sup>, Chandrabhas Narayana<sup>3</sup>, Nikita Ter-Oganessian<sup>4</sup>, A.P. Pyatakov<sup>5</sup>, Shixun Cao\*<sup>1,2</sup>, Jincang Zhang\*<sup>1,2</sup>, and Wei Ren\*<sup>1,2</sup>

<sup>1</sup>Materials Genome Institute, International Center for Quantum and Molecular Structures, Shanghai University, Shanghai 200444, China

<sup>2</sup>State Key Laboratory of Advanced Special Steel, Shanghai Key Laboratory of High Temperature Superconductors, Physics Department, Shanghai University, Shanghai 200444, China

<sup>3</sup>Chemistry and Physics of Materials Unit, Jawaharlal Nehru Centre for Advanced Scientific Research, Bangalore-560064, India

<sup>4</sup>Institute of Physics, Southern Federal University, Rostov-on-Don, 344090, Russia

<sup>5</sup>M.V. Lomonosov Moscow State University, Faculty of Physics 1-2 Leninskiye Gory, GSP-1, Moscow, 119991, Russia

\* sxcao@shu.edu.cn; jc Zhang@shu.edu.cn; renwei@shu.edu.cn

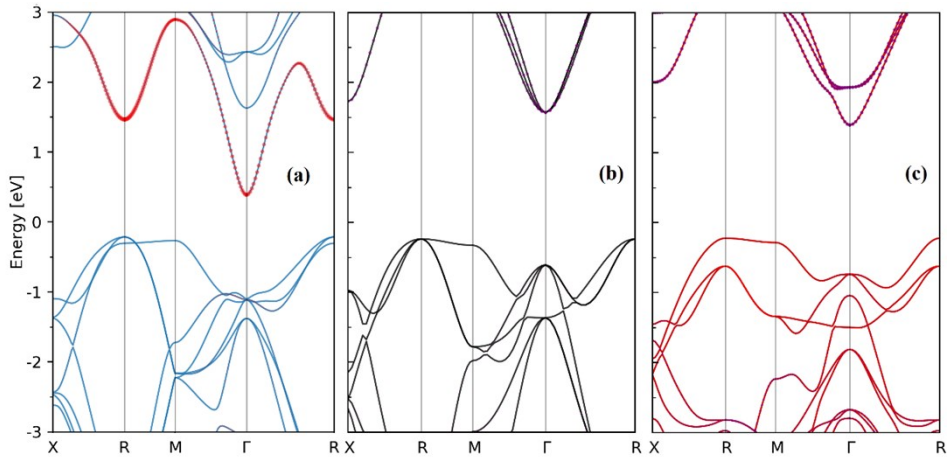

Figure S1. Orbital-projected band structures for conduction bands of bulk-phase (a)  $\text{CdTiO}_3$  with in-plane lattice constant of  $\text{BaTiO}_3$ , (b) cubic  $\text{SrTiO}_3$  and (c) tetragonal  $\text{BaTiO}_3$ . The red dots are for Cd-5s states and the purple dots are for Ti-3d states.

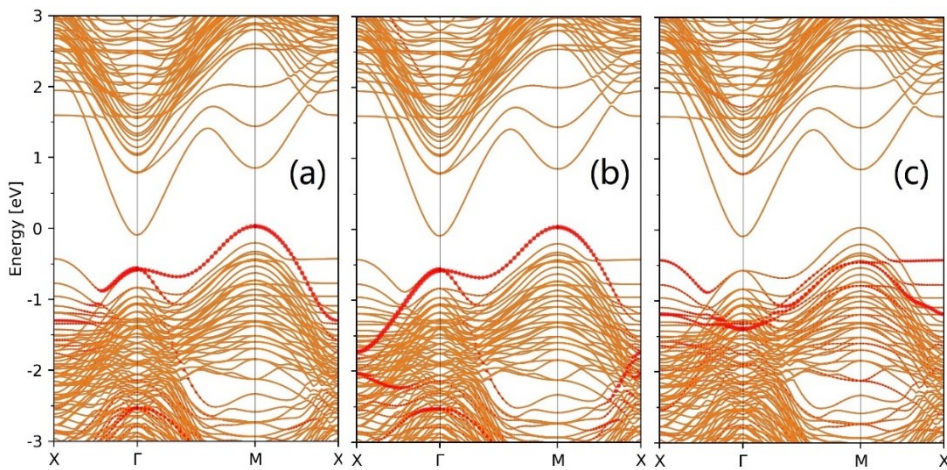

Figure S2. Orbital-projected band structures for the O 2p states of the p-type conductivities in  $(\text{CdTiO}_3)_4/(\text{BaTiO}_3)_8$  superlattice. The red circles in (a), (b) and (c) are for  $p_x$ ,  $p_y$  and  $p_z$  orbitals respectively.

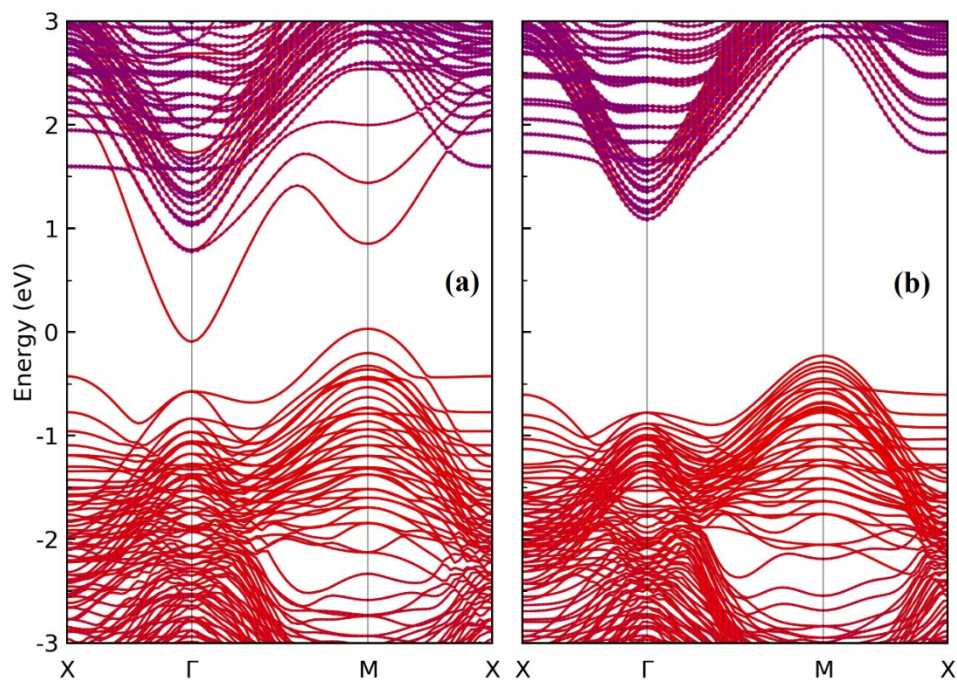

Figure S3. Orbital-projected band structures for Ti 3d states of (a)  $(\text{CdTiO}_3)_4/(\text{BaTiO}_3)_8$  and (b)  $(\text{SrTiO}_3)_4/(\text{BaTiO}_3)_8$  superlattices.

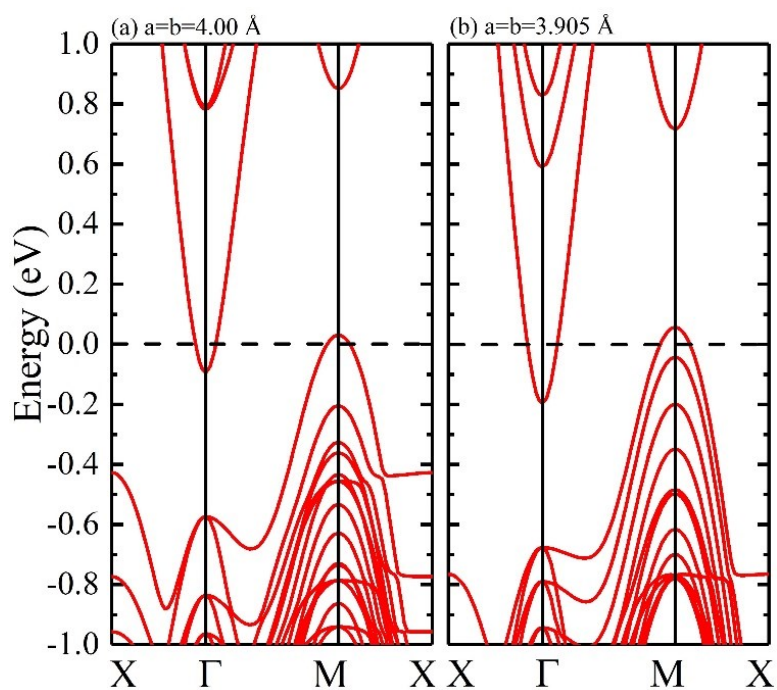

Figure S4. The calculated band structures for the  $(\text{CdTiO}_3)_4/(\text{BaTiO}_3)_8$  superlattice of (a)  $a=b=4 \text{ \AA}$  and (b)  $a=b=3.905 \text{ \AA}$ .

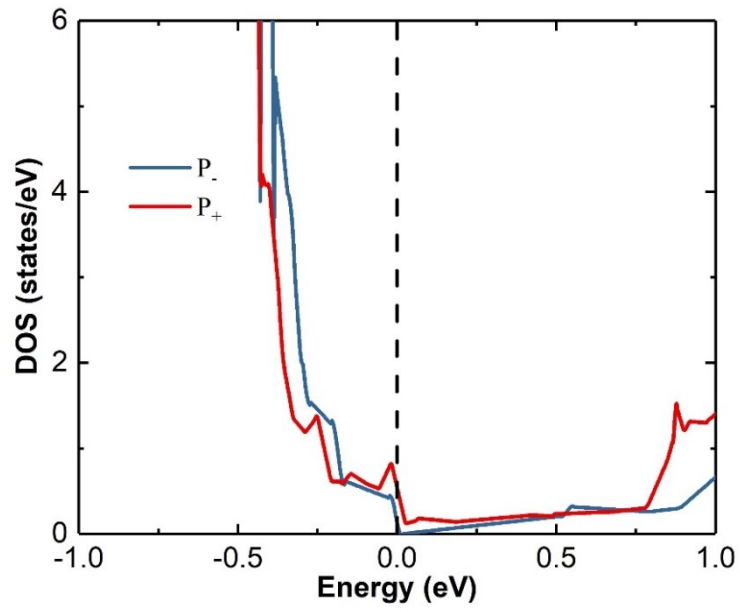

Figure S5. The calculated total density of states (DOS) for  $P_+$  and  $P_-$  of the  $(\text{CdTiO}_3)_4/(\text{BaTiO}_3)_8$  superlattice.

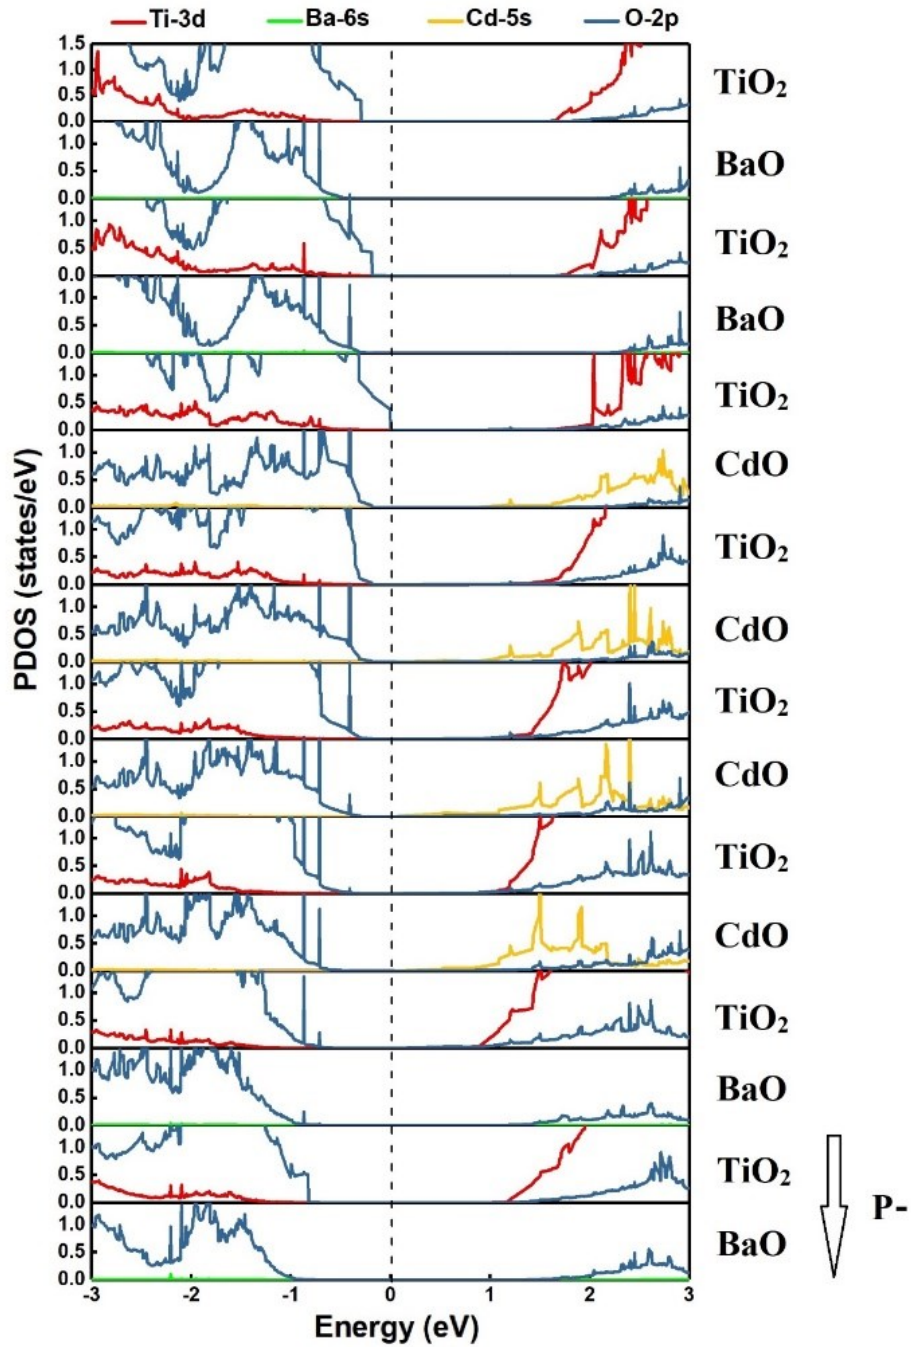

Figure S6. The calculated layer-resolved partial DOS for the  $(\text{CdTiO}_3)_4/(\text{BaTiO}_3)_8$  superlattice along P. direction in the range from -3.0 eV to 3.0 eV on each BaO, CdO and  $\text{TiO}_2$  layer.

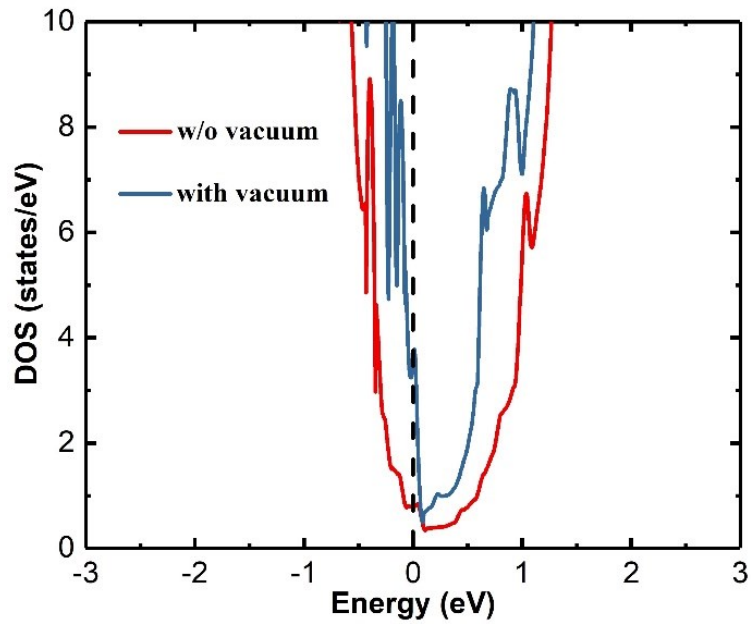

Figure S7. The calculated total density of states (DOS) for the supercell model (without vacuum) and thin film model (with vacuum) of the  $(\text{CdTiO}_3)_8/(\text{BaTiO}_3)_6$  heterostructure.

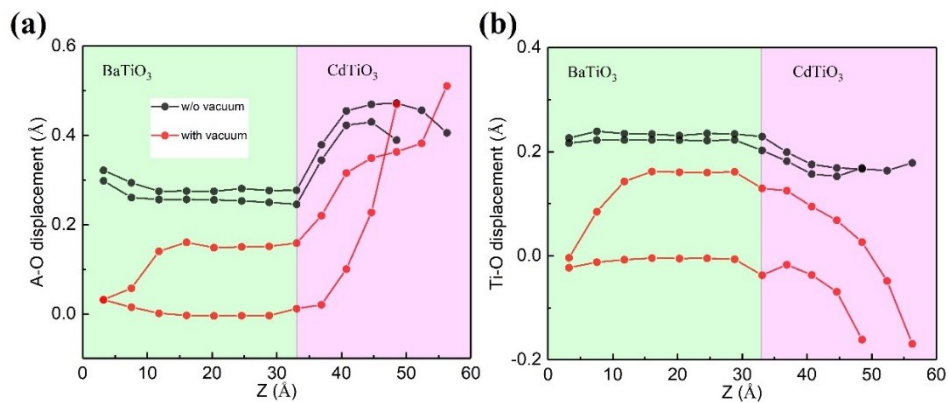

Figure S8. Structural distortions in the  $(\text{CdTiO}_3)_n/(\text{BaTiO}_3)_8$  heterostructure ( $n=4$  and  $6$ ) with the change in the number of  $\text{CdTiO}_3$  layers along  $c$ -axis for (a) A-site cation (Cd in  $\text{CdTiO}_3$  and Ba in  $\text{BaTiO}_3$ ) displacements and (b) B-site cation (Ti in  $\text{CdTiO}_3$  and  $\text{BaTiO}_3$ ) displacements along the  $c$ -axis with respect to the oxygen in the plane. The black/red line is the supercell/thin film model without/with vacuum, respectively.
