# Supplementary figures and images for: The CdTiO3/BaTiO3 superlattice interface from first principles
Source: Royal Society of Chemistry journal article supplement (doi:10.1039/d1nr00374g), 2021-01-01

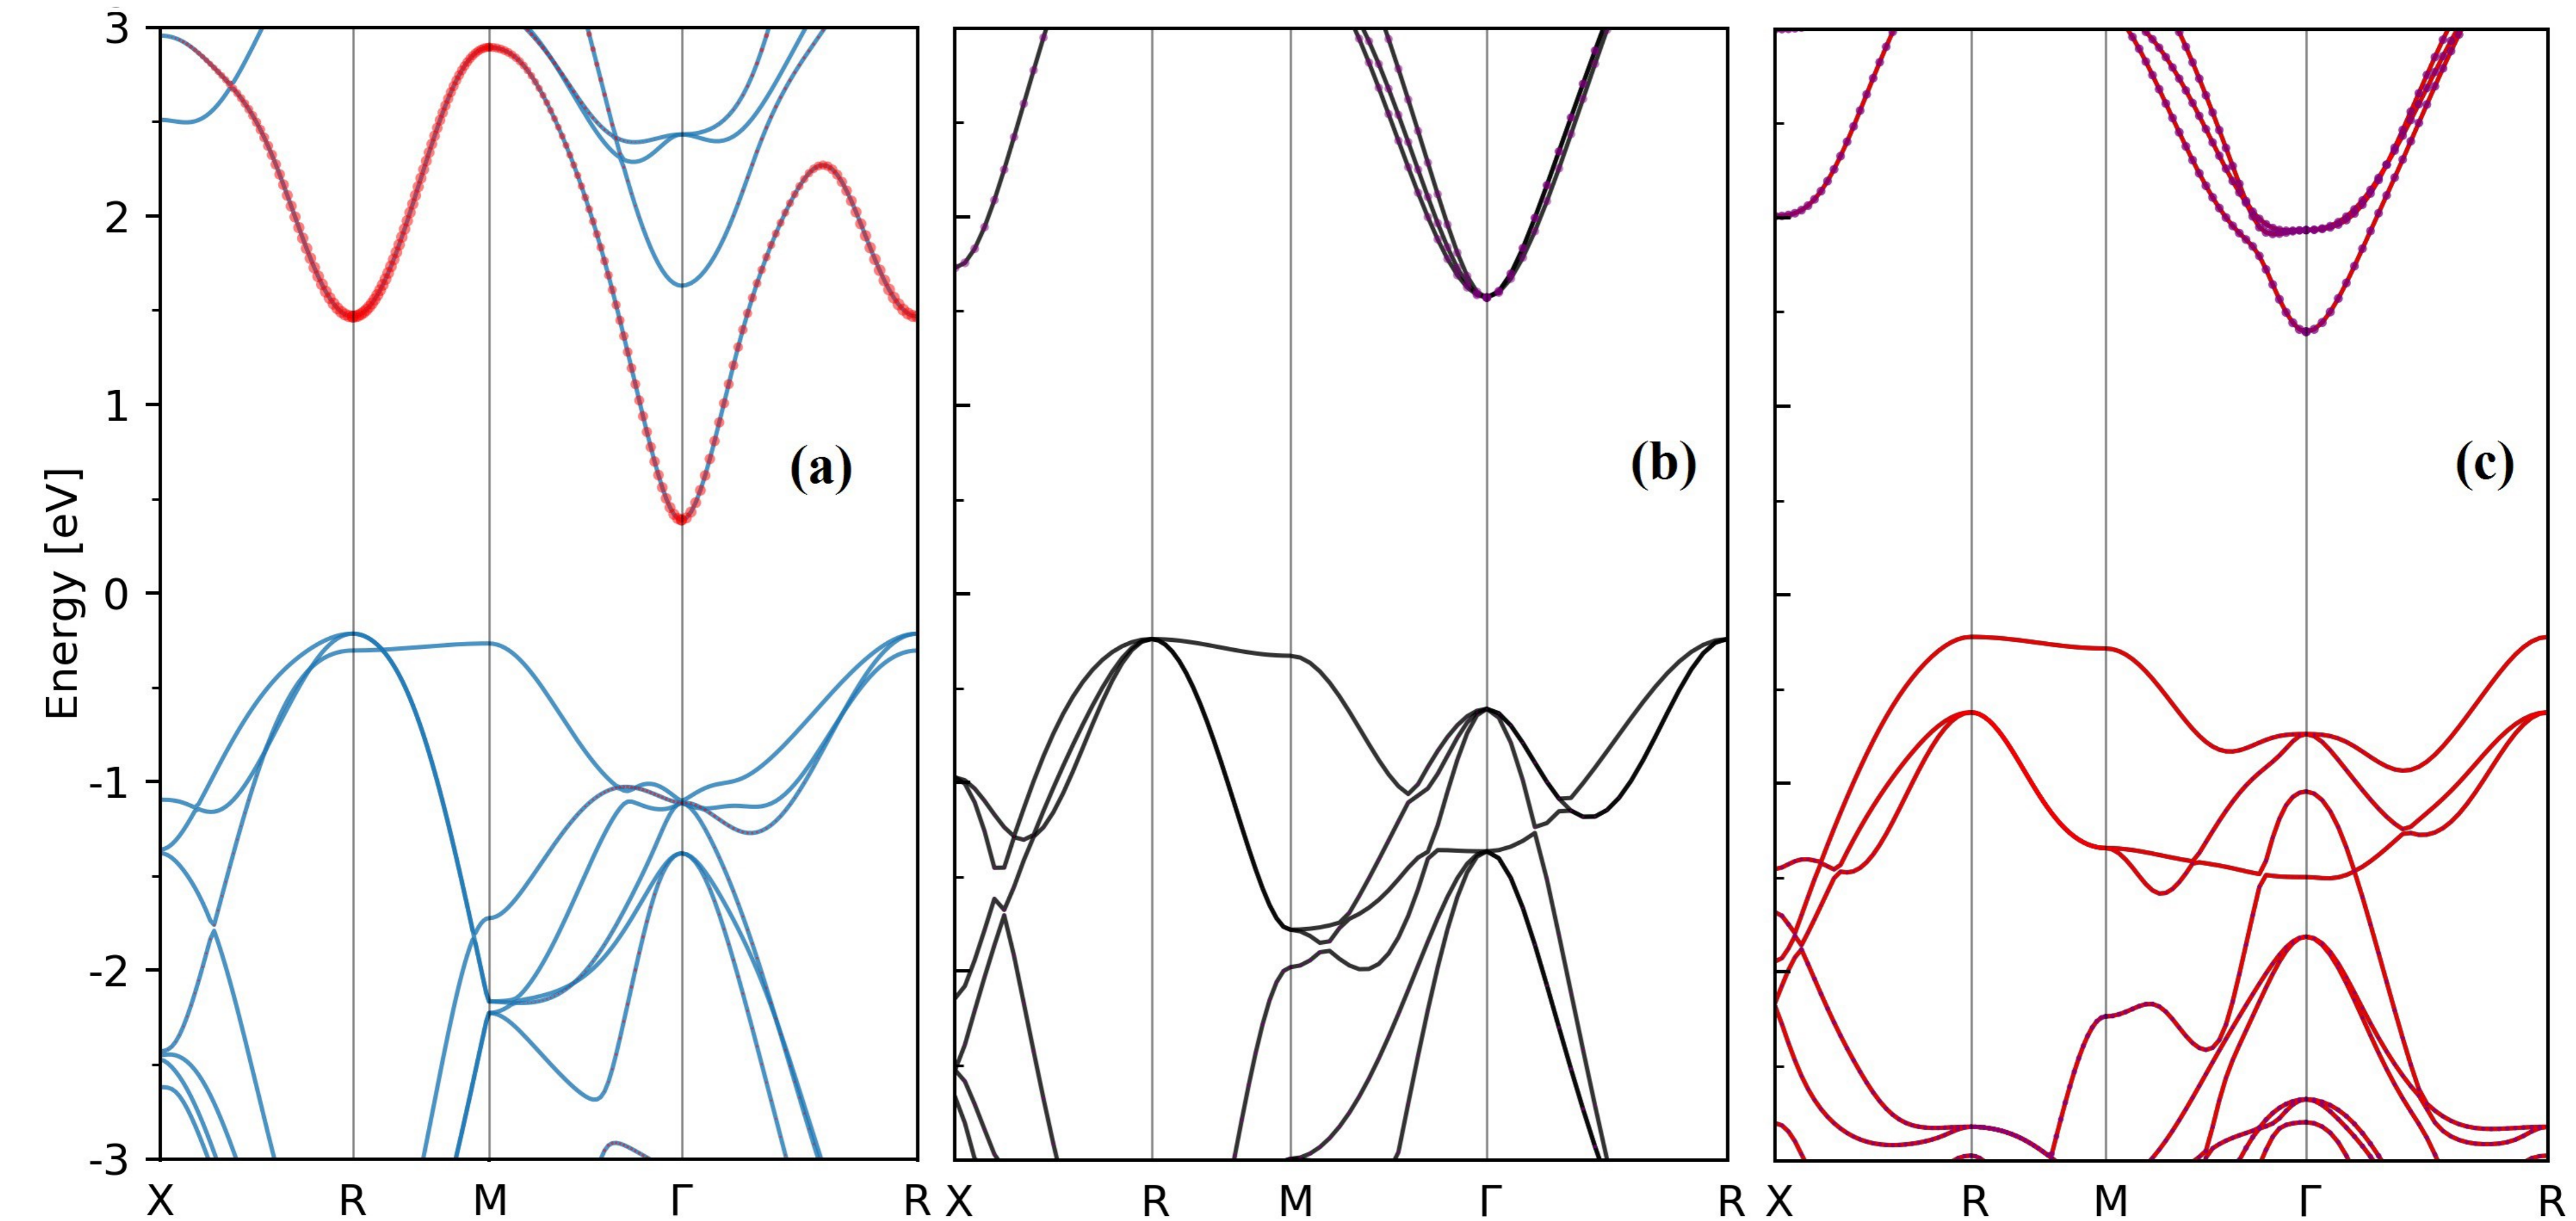

Supplement: d1nr00374g2.pdf [file d1nr00374g2.pdf]

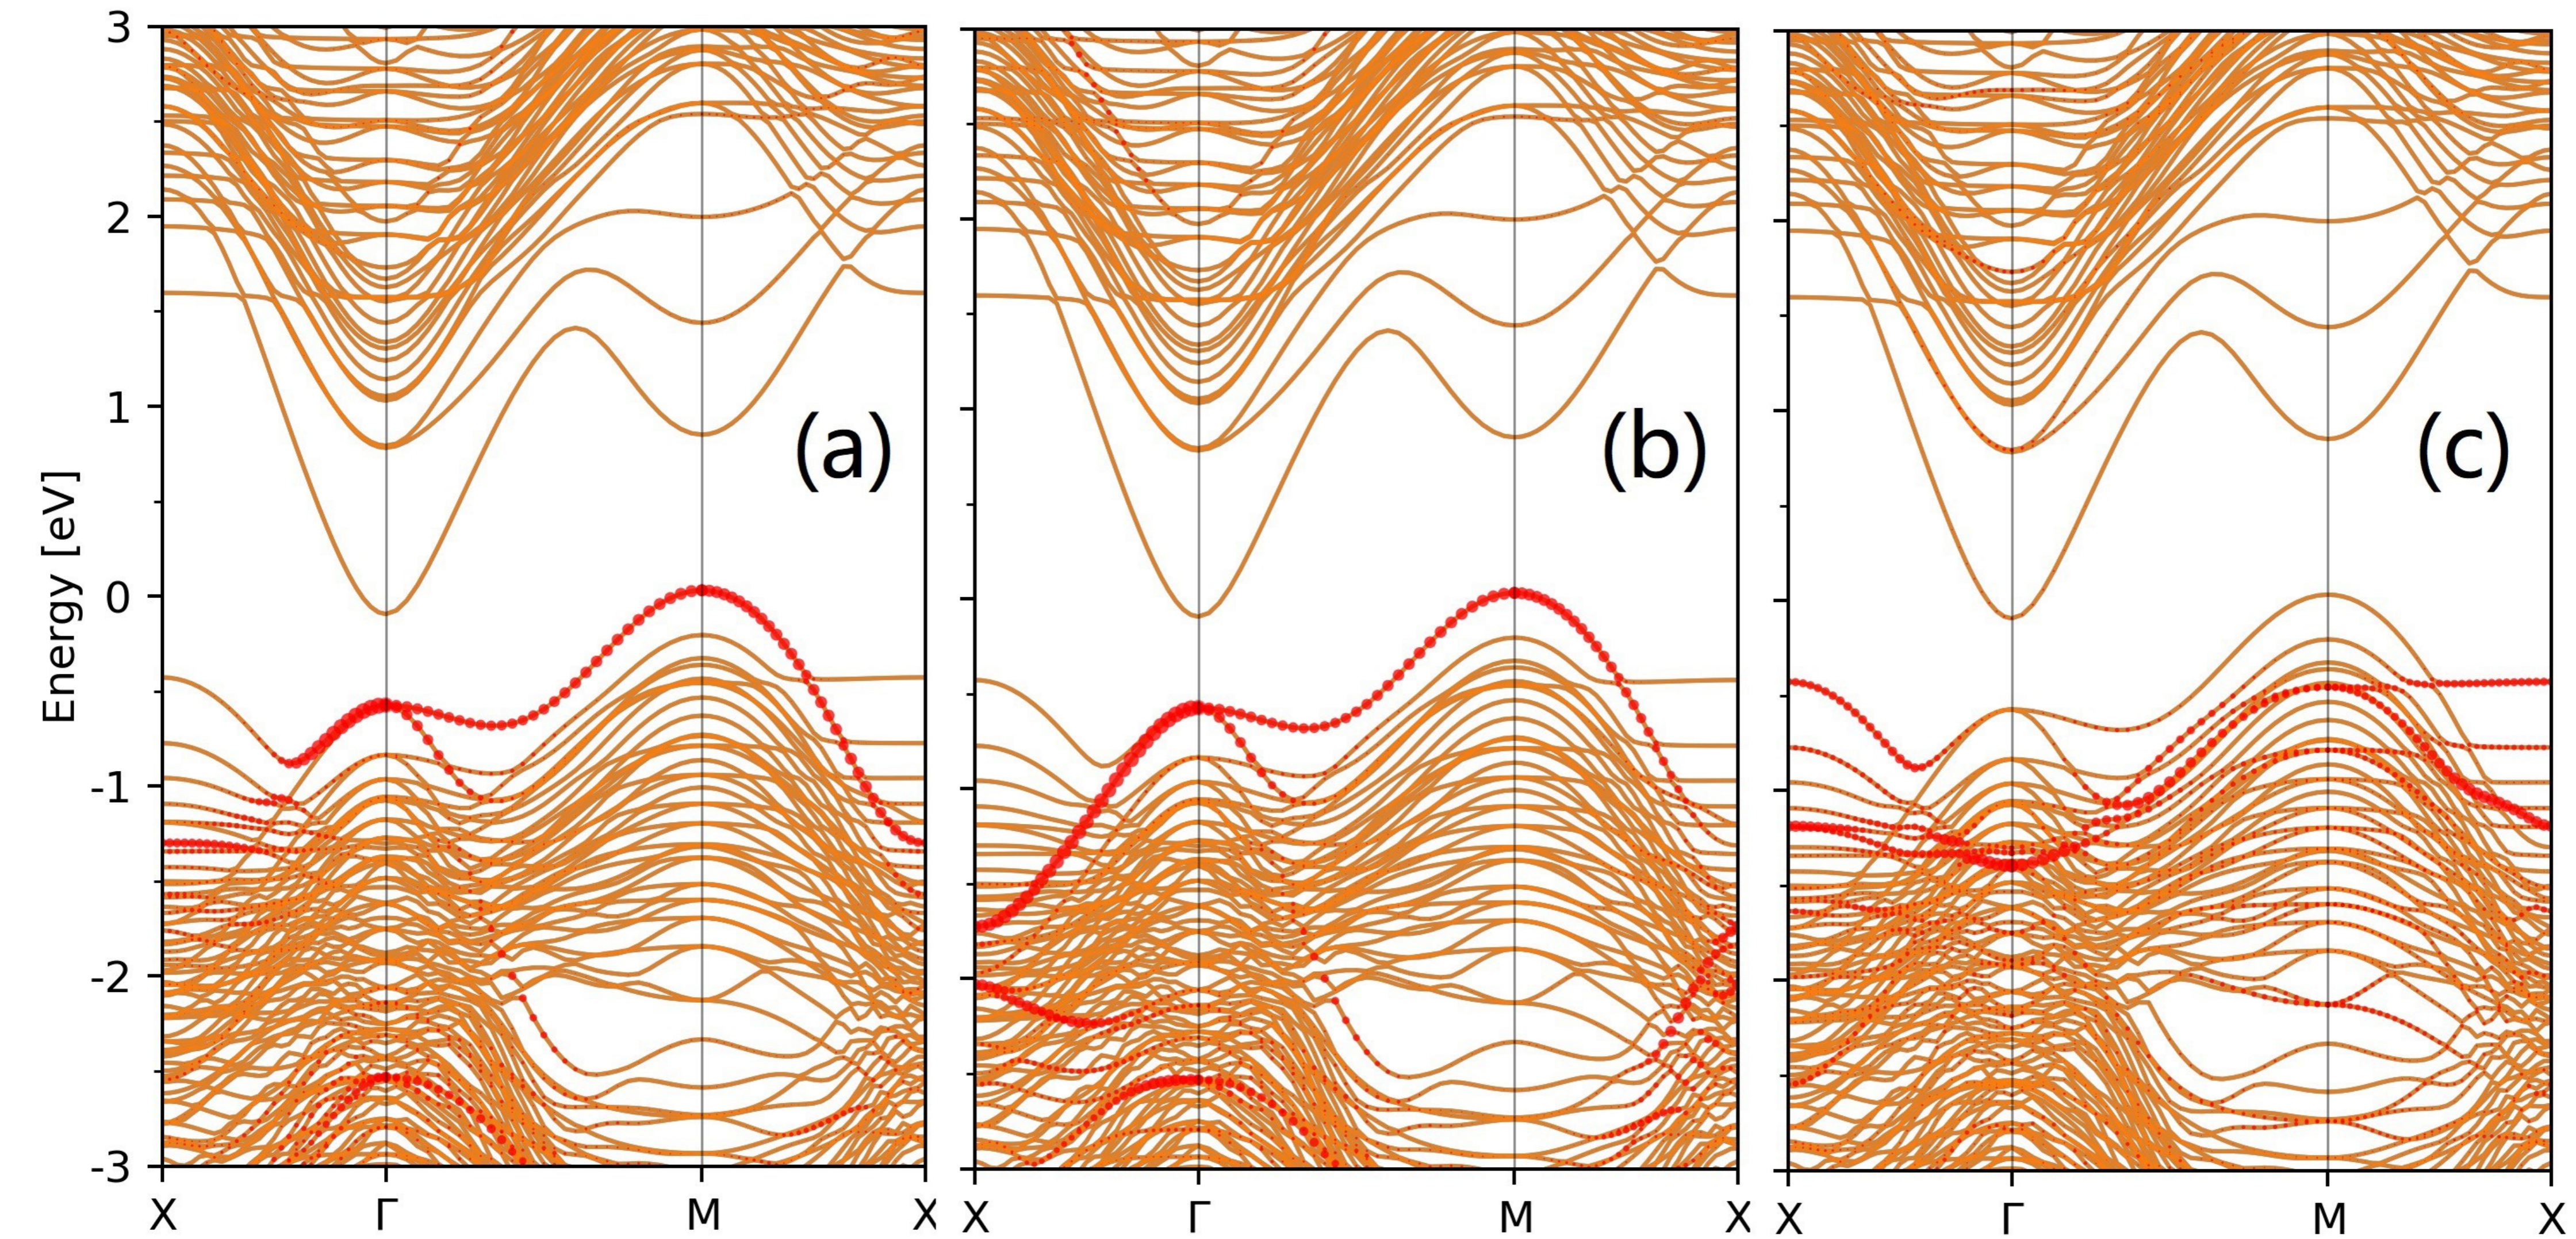

Supplement: d1nr00374g3.pdf [file d1nr00374g3.pdf]

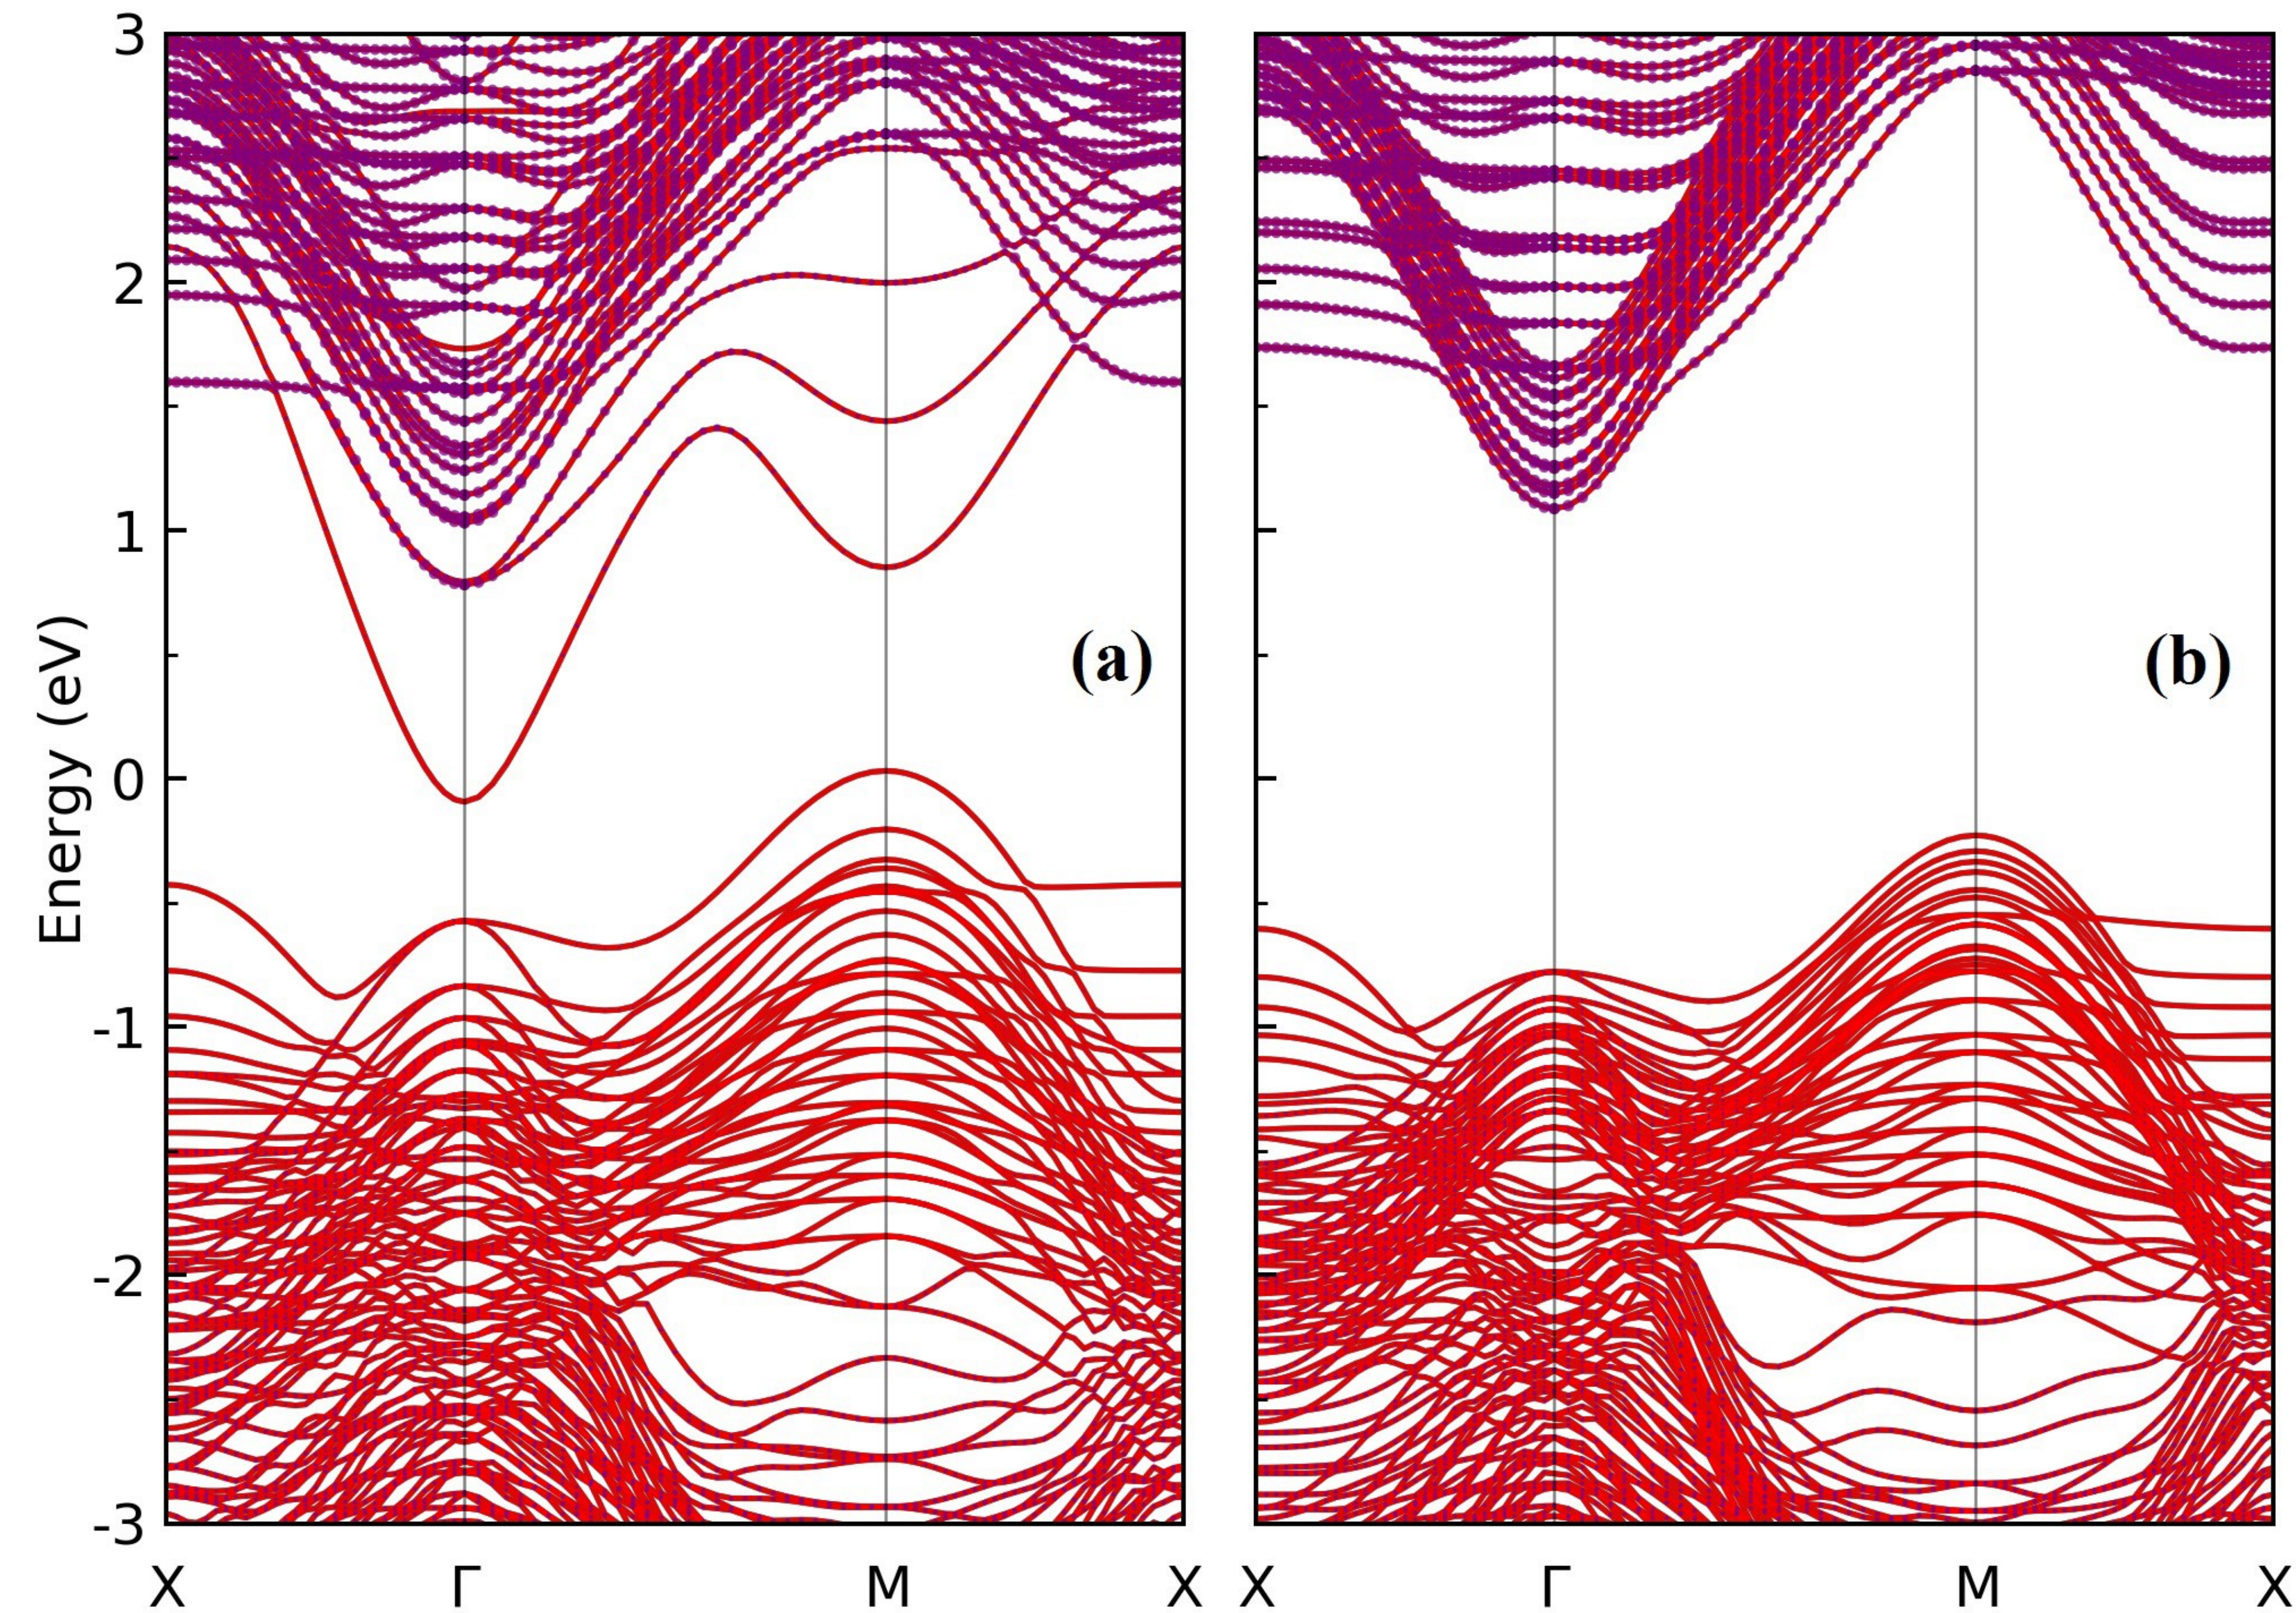

Supplement: d1nr00374g4.pdf [file d1nr00374g4.pdf]

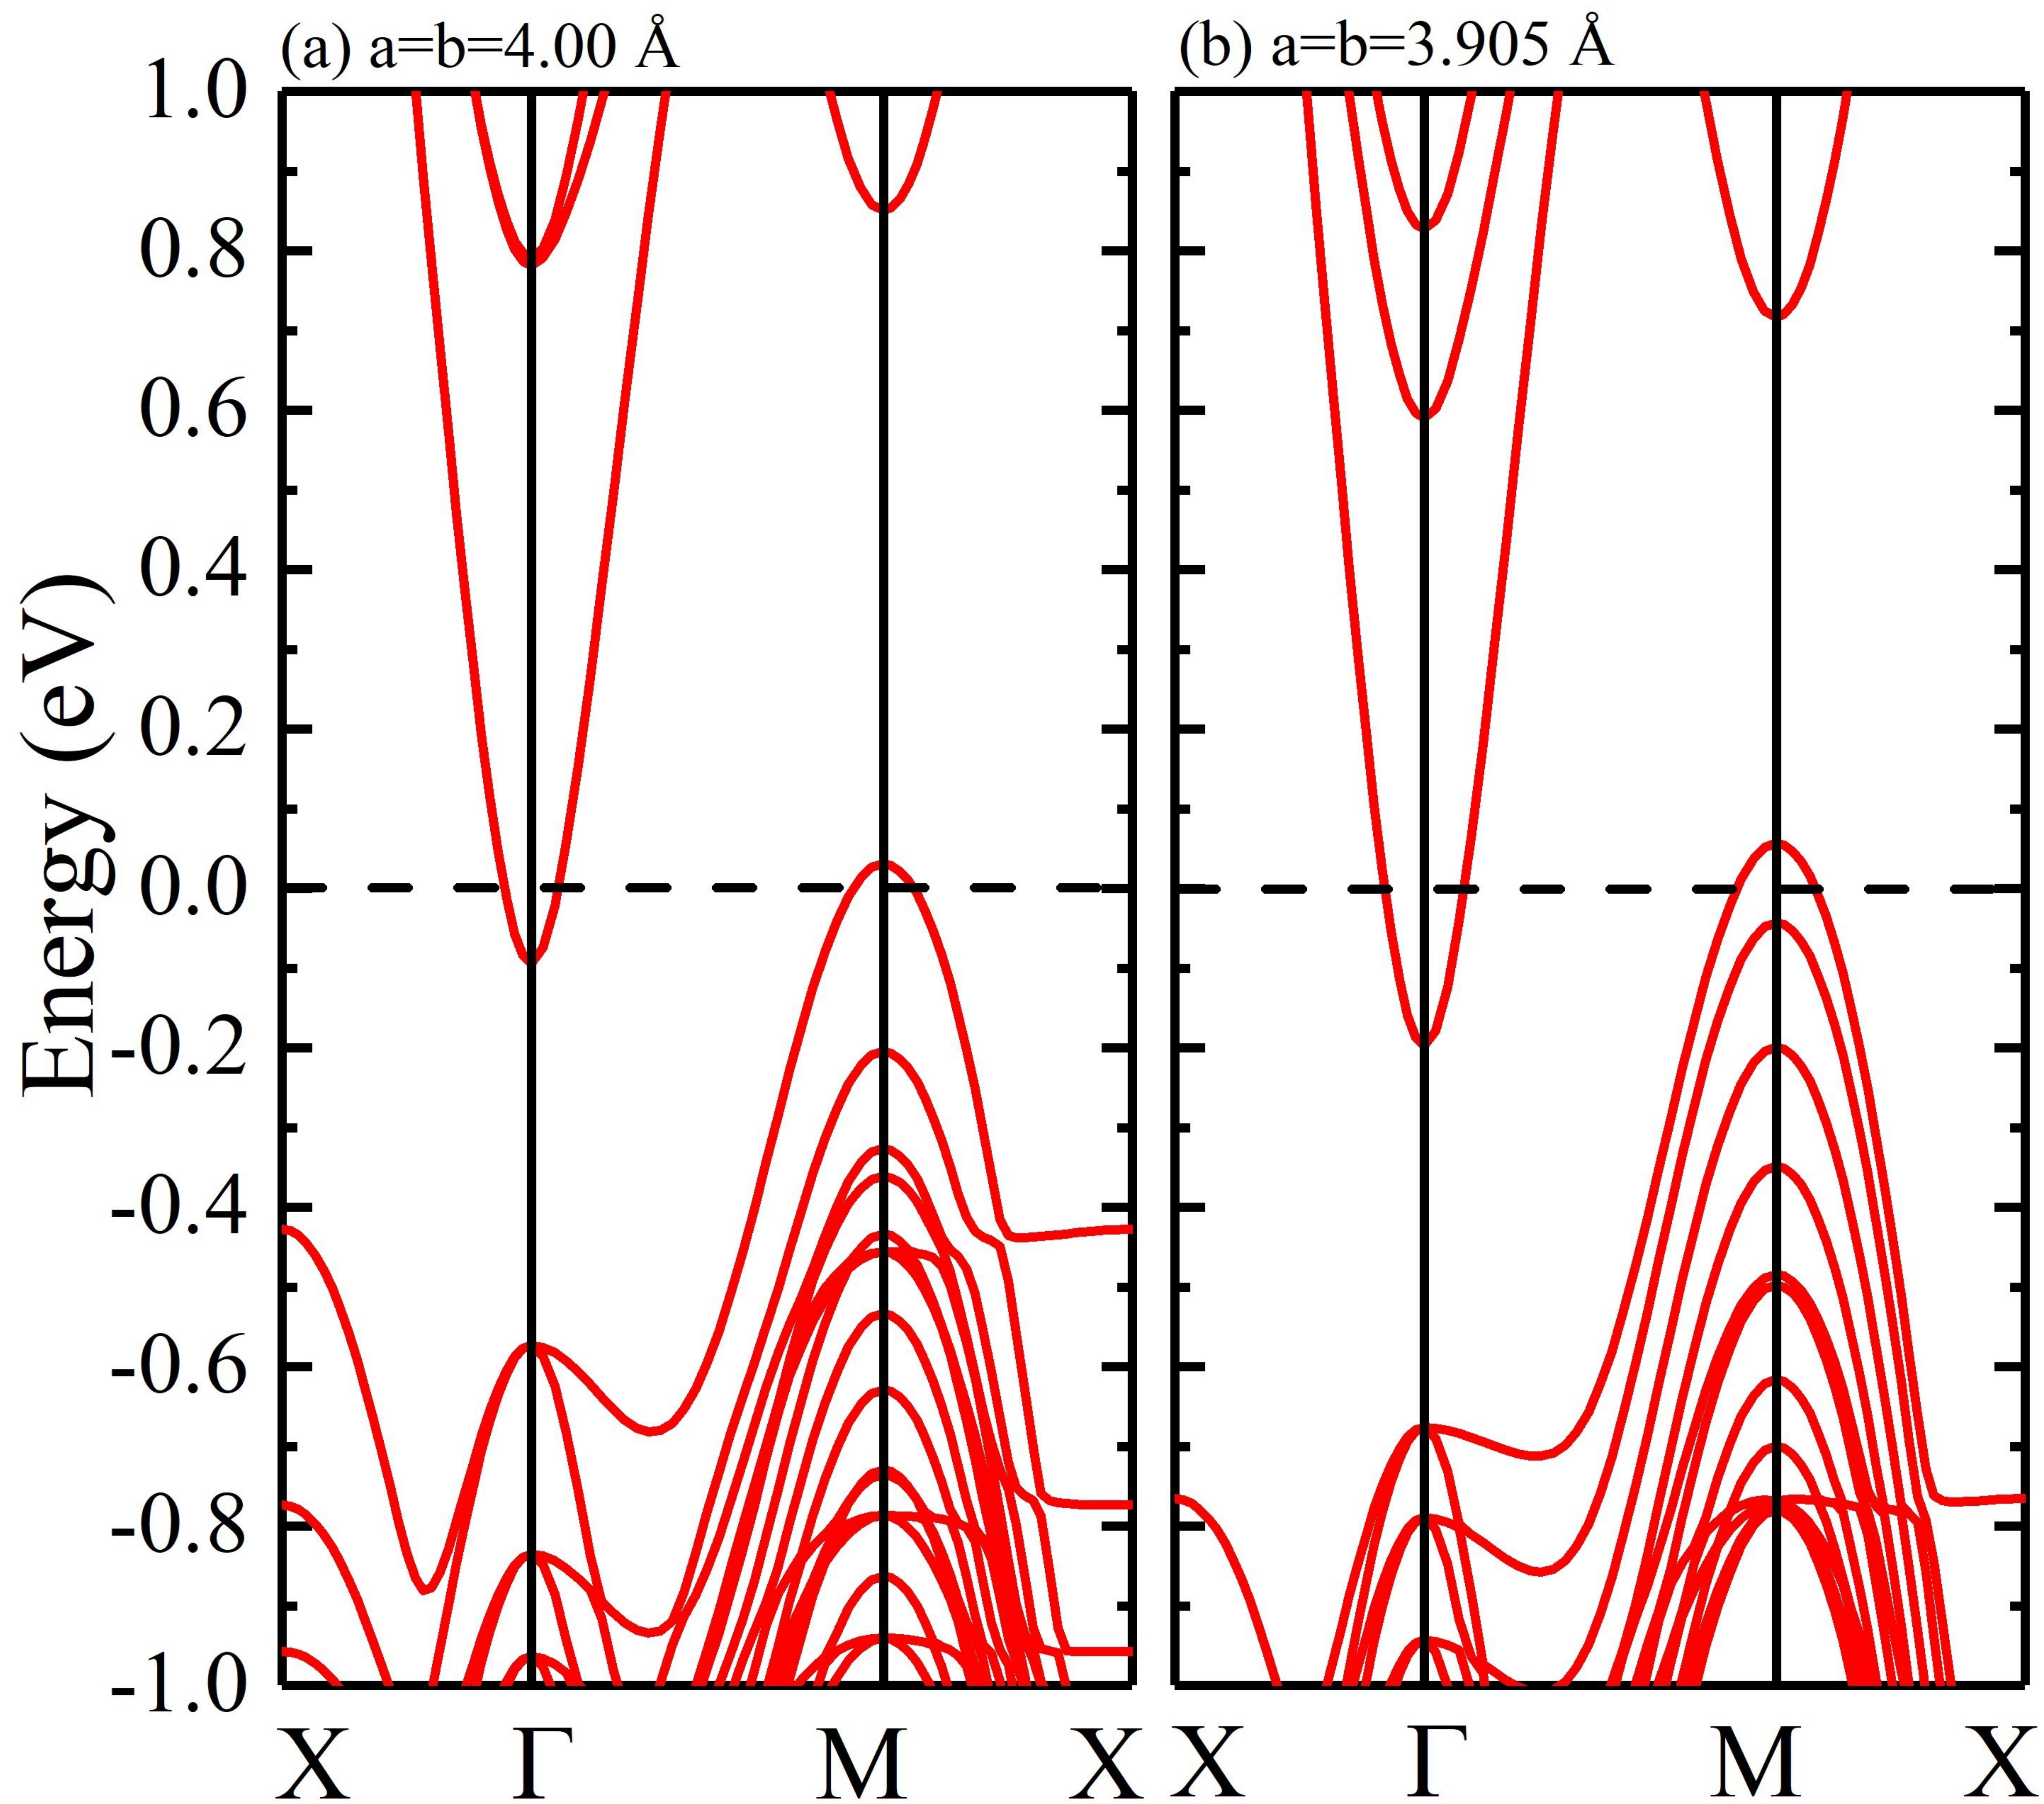

Supplement: d1nr00374g5.pdf [file d1nr00374g5.pdf]

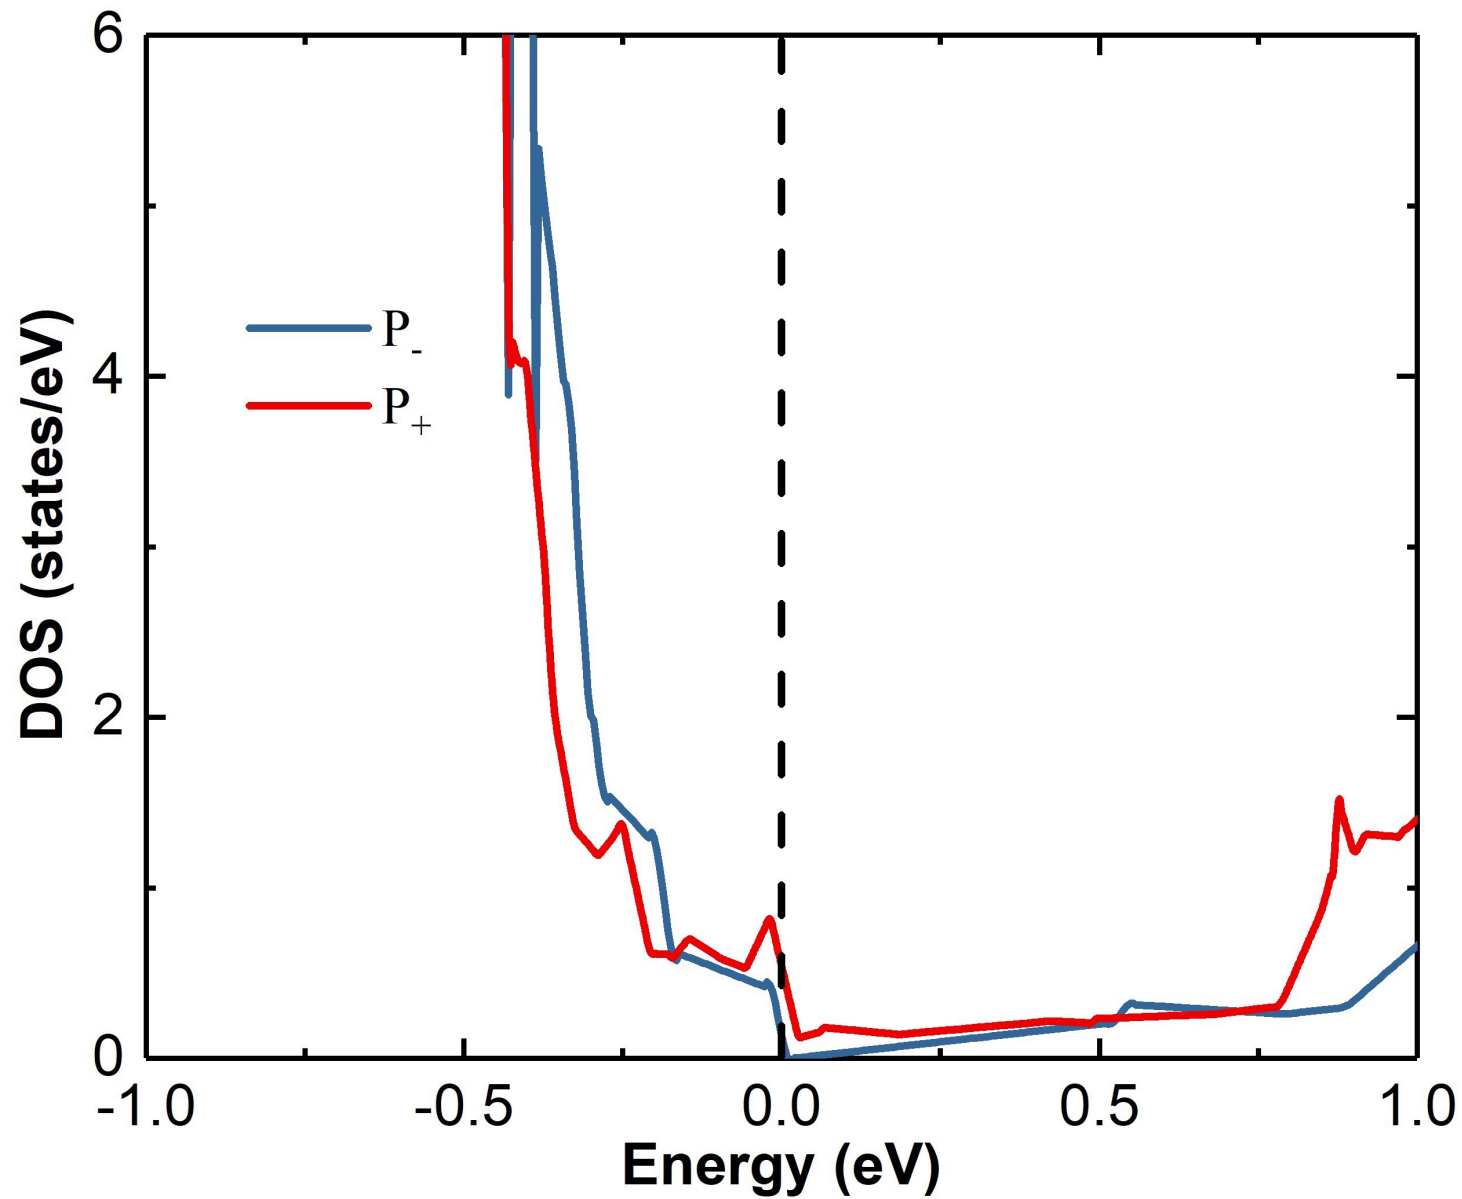

Supplement: d1nr00374g6.pdf [file d1nr00374g6.pdf]

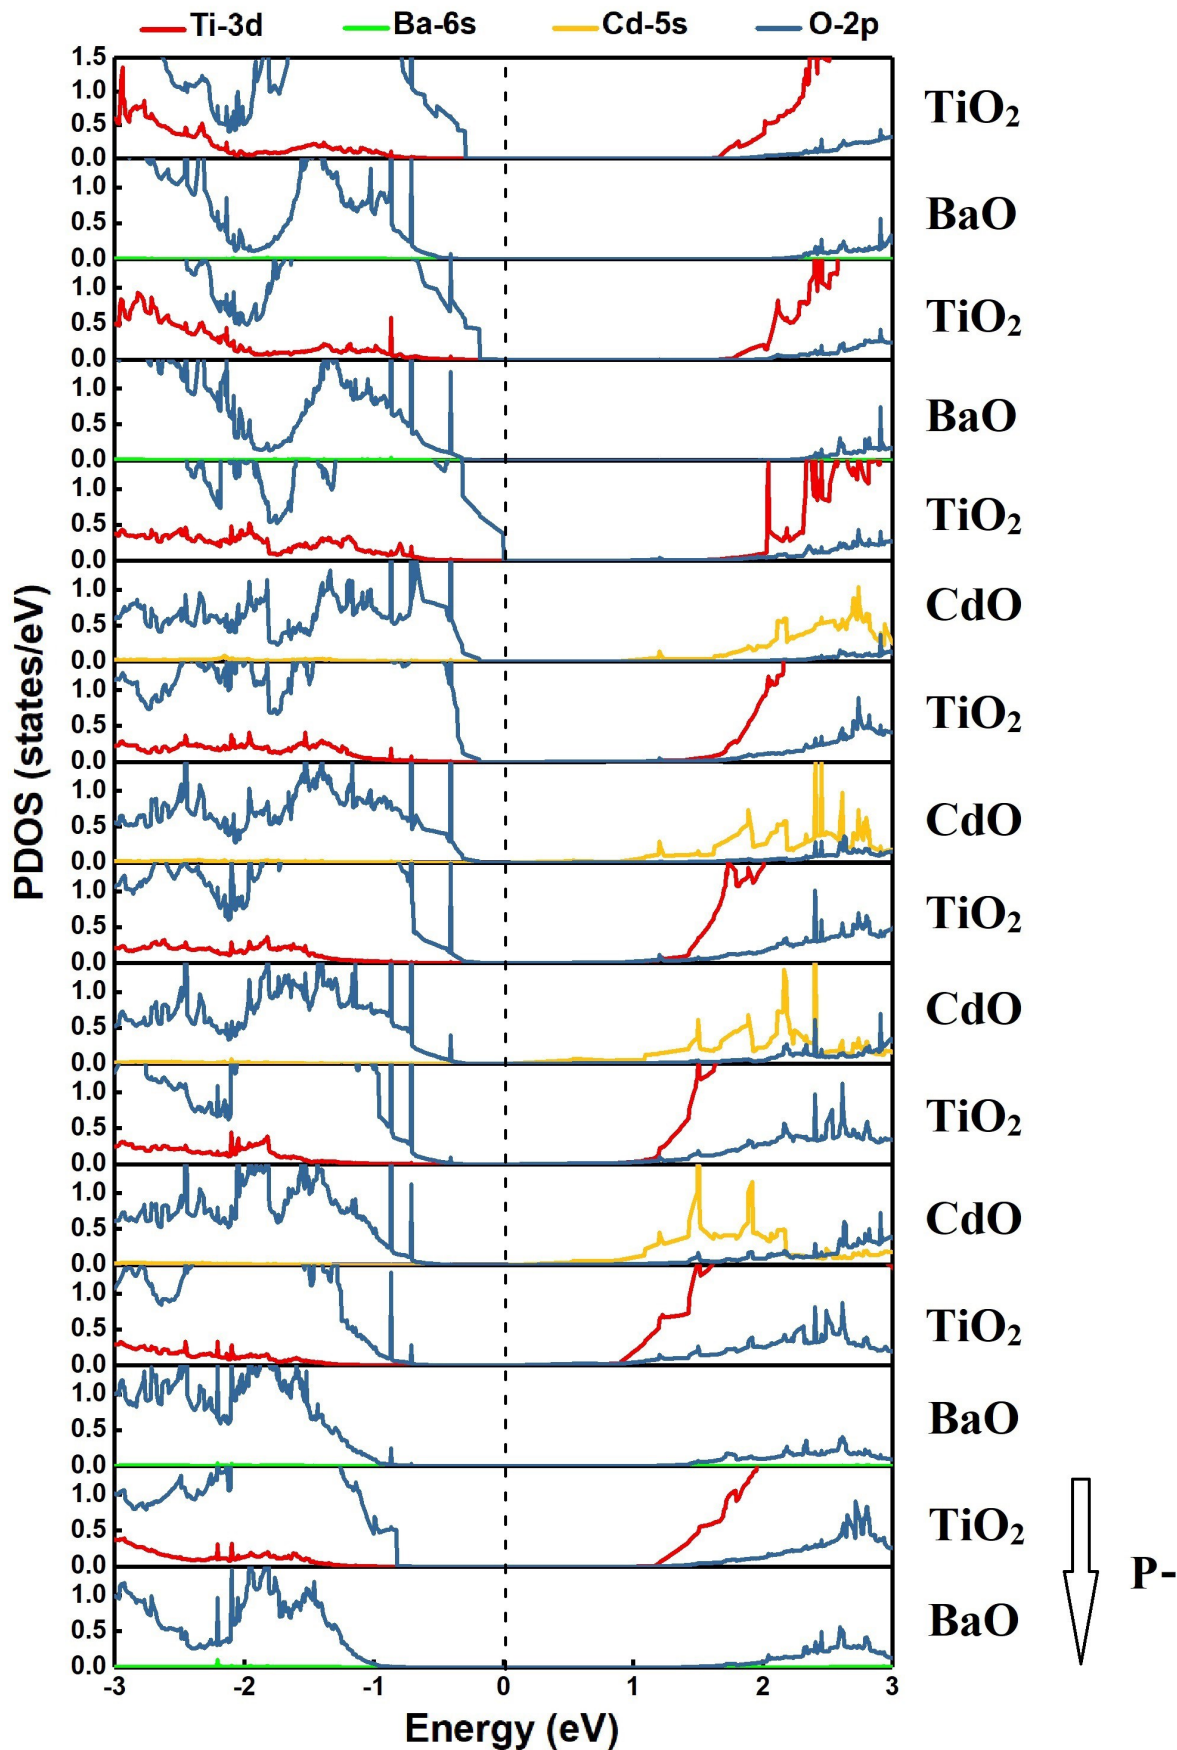

Supplement: d1nr00374g7.pdf [file d1nr00374g7.pdf]

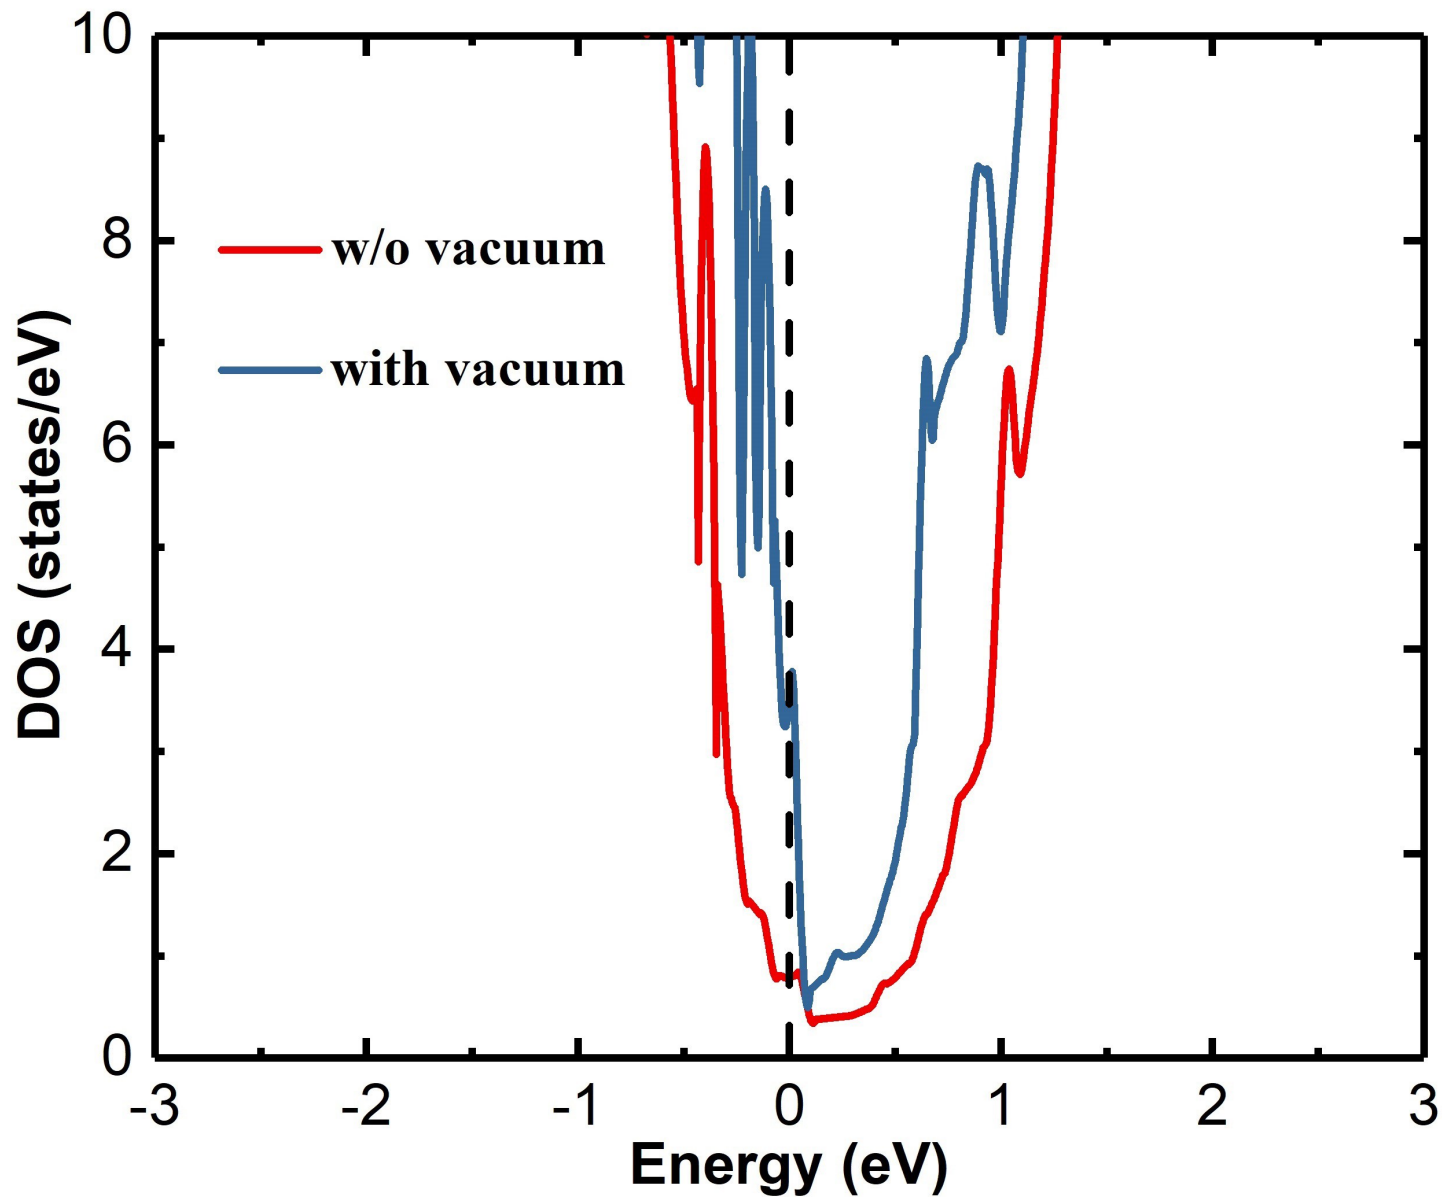

Supplement: d1nr00374g8.pdf [file d1nr00374g8.pdf]

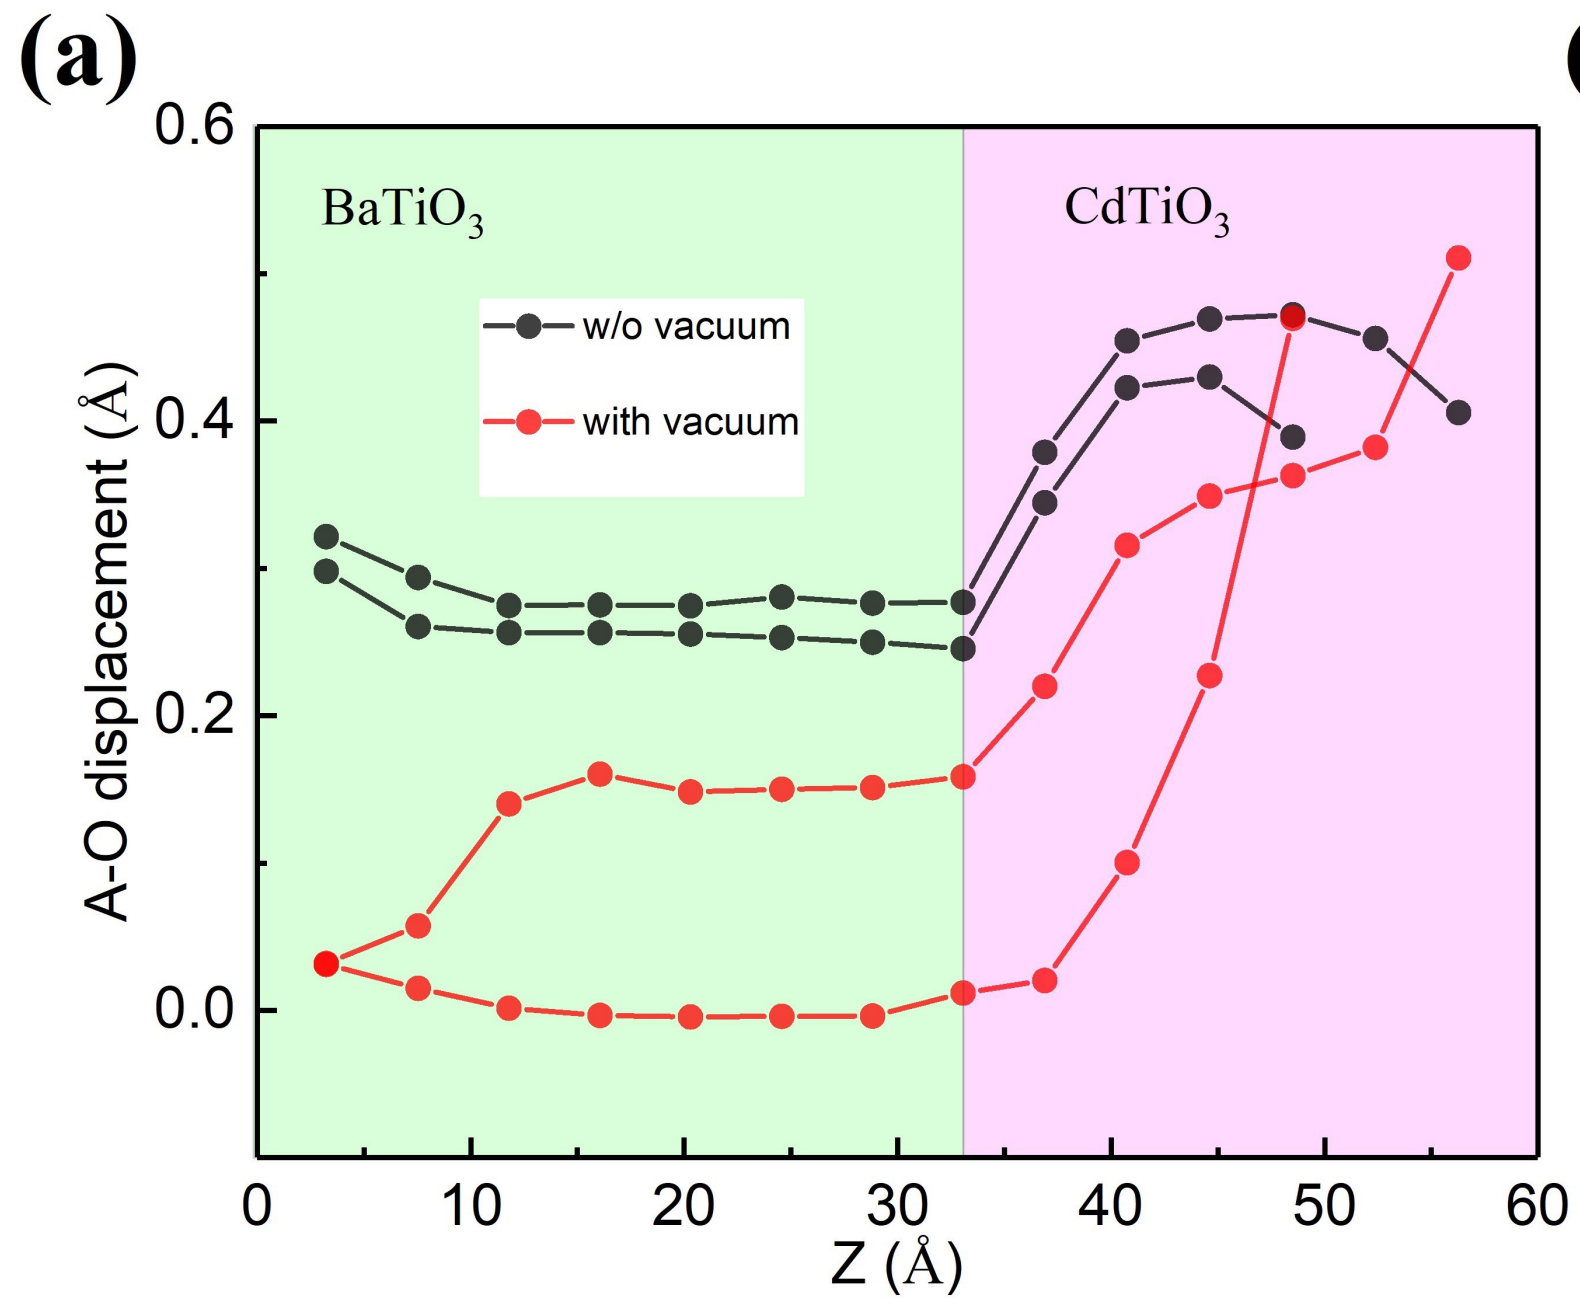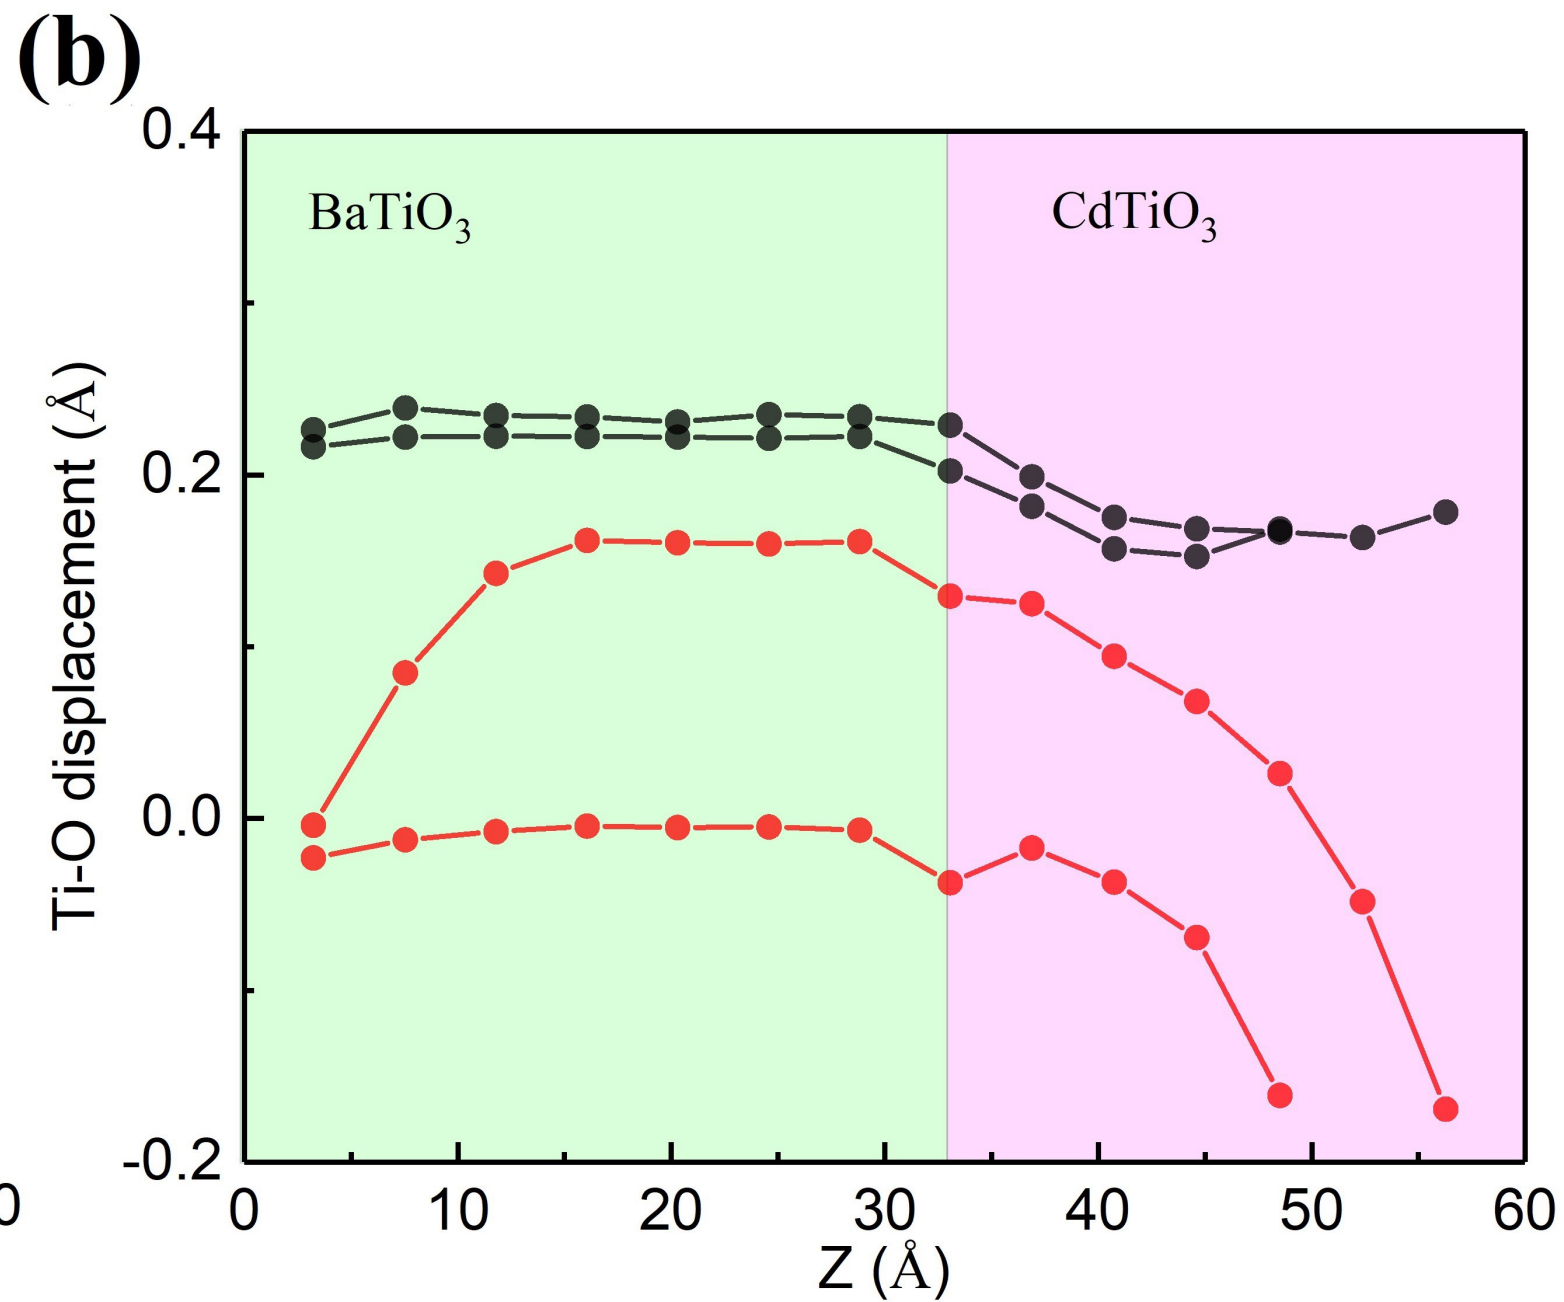

Supplement: d1nr00374g9.pdf [file d1nr00374g9.pdf]
